# Supplementary material for: The Impact of Microbiome and Microbiota-Derived Sodium Butyrate on Drosophila Transcriptome and Metabolome Revealed by Multi-Omics Analysis
Source: MDPI journal article supplement (doi:10.3390/metabo11050298), 2021-05-06
Supplement: s1 [file s1]

# The Impact of Microbiome and Microbiota-Derived Sodium Butyrate on *Drosophila* Transcriptome and Metabolome Revealed by Multi-Omics Analysis

Fan Zhou <sup>1,†</sup>, Biaodi Liu <sup>2,†</sup>, Xin Liu <sup>1</sup>, Yan Li <sup>2</sup>, LuoLuo Wang <sup>1</sup>, Jia Huang <sup>1</sup>, Guanzheng Luo <sup>2,\*</sup> and Xiaoyun Wang <sup>1,\*</sup>

<sup>1</sup> Guangdong Provincial Key Laboratory of Insect Developmental Biology and Applied Technology, Institute of Insect Science and Technology, School of Life Sciences, South China Normal University, Guangzhou 510631, China.

<sup>2</sup> State Key Laboratory of Biocontrol, School of Life Sciences, Sun Yat-sen University, Guangzhou 510275, PR China.

†These authors have contributed equally to this work.

\*Correspondence: luogzh5@mail.sysu.edu.cn; wangxy@scnu.edu.cn

**Supplementary Table S1.** Primer sequences used for RT-qPCR analysis in this study.

| Gene               | Forward Primer          | Reverse Primer          |
|--------------------|-------------------------|-------------------------|
| <i>Pten</i>        | AACCTGCTCGGTTGGAACAT    | ACACTATCAGCACCACACGAA   |
| <i>Set1</i>        | AAAAC TTCAACCGCCAGTGC   | GGCGGTGCATTTCCTAAAAGT   |
| <i>Cyp6a8</i>      | GAAAGCAAGGCACCGTTTGT    | GGCACCGTCCAGATTGAAGA    |
| <i>LysD</i>        | CTGCAACGCTCTCCTGACC     | TGCGCAATCGTTTTAATCGGG   |
| <i>Jon25Bi</i>     | GCGGTGGTTCTATCATCGCC    | GGCCAGTTGTGGTTCTGGAT    |
| <i>Mal-A1</i>      | AGTGGTGGGAGAGTGGAACT    | GCCGATGTCTTTCAGGTAATG   |
| <i>Mal-A4</i>      | TTCAAAGACAGTGACGGAAATGG | TTTCAGAAAAGGAGACAGCCAG  |
| <i>Mal-A6</i>      | GCAGCGATACTCGTTTTGGG    | TGCCACTTGCCACCAATCTC    |
| <i>Gba1a</i>       | CAGGGACTTCGGTTCTCCAC    | GACAGGATTGTTCGATTTCGC   |
| <i>LysB</i>        | TCTTGACCGACGACATCACC    | CGAAGAGGAGATGCTGGTGTTA  |
| <i>LysE</i>        | TAAGGGCCCCATTGCGAGGA    | CCAATTGGTTCACGAGGAACG   |
| <i>SPH93</i>       | GCAATCGGAATCTACTCTTAGC  | TGGAGCGGTAATCAAATGTTGG  |
| <i>Hsp23</i>       | ATTCCATTGTTGTTGAGCCTTGC | GGCCAAGTAGGGATTCTCTTG   |
| <i>Hsp68</i>       | CGACAACGGCAAACCAAAGAT   | TAGTGCCCAGGTAGGCTTCTG   |
| <i>Lip2</i>        | CGGCAGCACATCGACTTGA     | GGAGTGTCCAATTAGTACCACCT |
| <i>CG6283</i>      | GCTCCGTTCTCTACTACGCC    | GTAGGTGCTTCGCGAGTTCT    |
| <i>CG5246</i>      | CTGTCTCAATGTTCCGGCGAAA  | CCTCCAATCACACGGGTCTC    |
| <i>Jon25Bi</i>     | GCGGTGGTTCTATCATCGCC    | GGCCAGTTGTGGTTCTGGAT    |
| <i>Npc2e</i>       | CACTTCCTGGGCAATAACAACA  | GACACTTCGTCGGGTAGGG     |
| <i>Intr</i>        | GACCGCTCCGCAGTTTAATGT   | CTCTGGTAGGGATAGGGCACT   |
| <i>Lectin-37Da</i> | AAACCCGTACAACCTGACCGT   | TTCTCGTAGGCGACATACCAA   |
| <i>Gba1a</i>       | CAGGGACTTCGGTTCTCCAC    | GACAGGATTGTTCGATTTCGC   |
| <i>Ctr1B</i>       | TGGTGTCTTCCTGTATGAGG    | CTCGTTCTTCCTACGCTGCT    |
| <i>SPH93</i>       | GCAATCGGAATCTACTCTTAGC  | TGGAGCGGTAATCAAATGTTGG  |
| <i>Rp49</i>        | GCCCAAGGGTATCGACAACA    | ACCTCCAGCTCGCGCACGTT    |

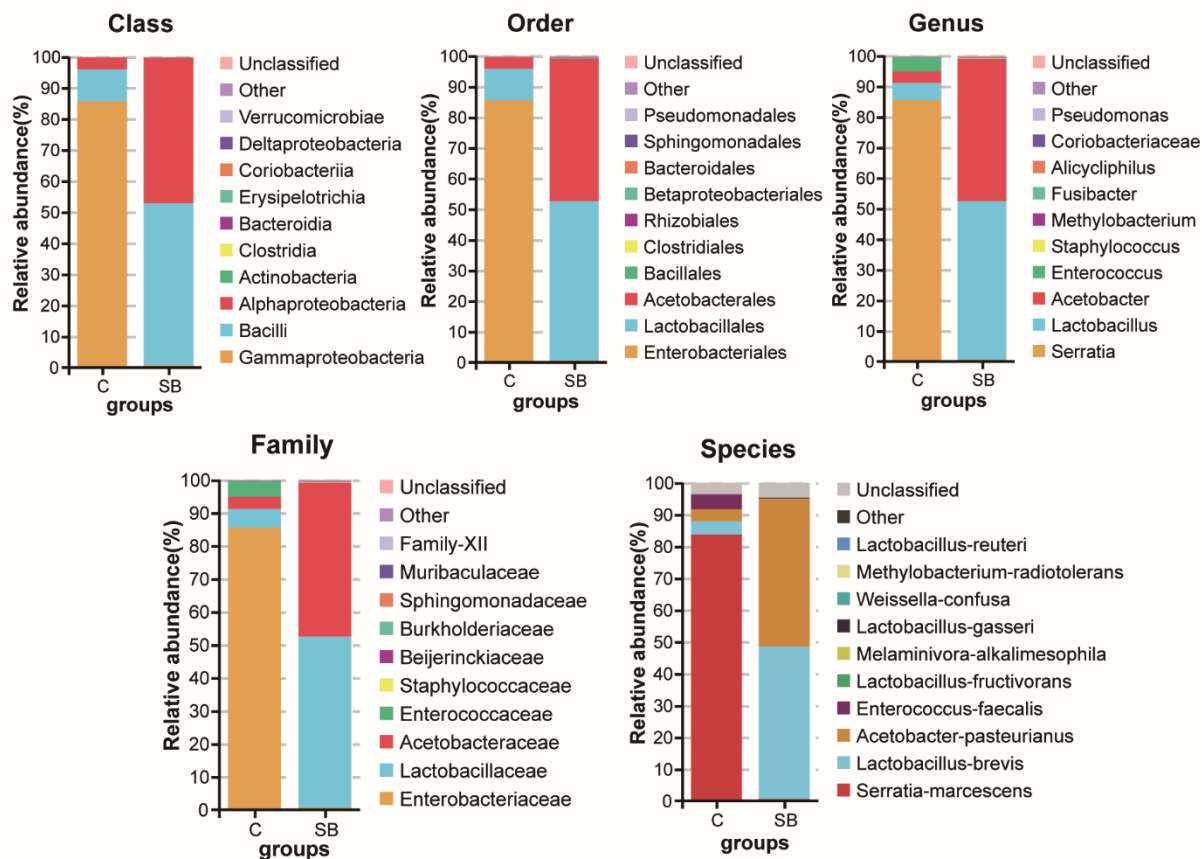

**Supplementary Figure S1.** Gut microbiome analysis of bacterial structure at the class, order, family, genus, species level, respectively. 16S rDNA sequencing data from conventional *Drosophila* (C) and sodium butyrate-treated *Drosophila* (SB) were used,  $n=3$ .

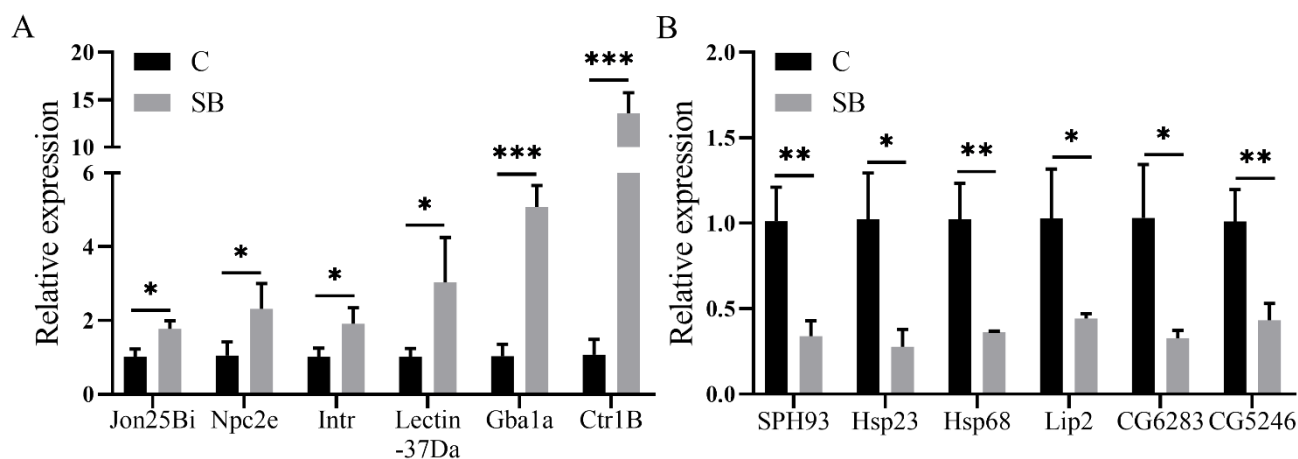

**Supplementary Figure S2.** Quantitative RT-PCR validation of genes from conventional *Drosophila* (C) and sodium butyrate-treated *Drosophila* (SB). **(A)** Relative expression of up-regulated transcripts in the transcriptome data. **(B)** Relative expression of down-regulated transcripts in the transcriptome data. Significant differences are determined by the unpaired Student's *t*-test. \* $P < 0.05$ , \*\* $P < 0.01$ .
